# Supplementary material for: A systematic literature review of crowdfunding and sustainability: highlighting what really matters
Source: Springer Nature journal article supplement (doi:10.1007/s11301-020-00189-3), 2020-06-08
Supplement: MOESM1 [file 18063014]

## **Appendix I:** Compilation of all papers included in the final sample of the systematic literature review

- Aitamurto T (2011) The impact of crowdfunding on journalism: Case study of spot.us, a platform for community-funded reporting. *Journal Pract* 5:429–445.  
<https://doi.org/10.1080/17512786.2010.551018>
- Allison TH, Davis BC, Short JC, Webb JW (2015) Crowdfunding in a prosocial microlending environment: Examining the role of intrinsic versus extrinsic cues. *Entrep Theory Pract* 39:53–73.  
<https://doi.org/10.1111/etap.12108>
- Amtzis R (2014) Crowdsourcing from the Ground Up: How a New Generation of Nepali Nonprofits Uses Social Media to Successfully Promote its Initiatives. *J Creat Commun* 9:127–146.  
<https://doi.org/10.1177/0973258614528609>
- Anglin AH, Allison TH, McKenny AF, Busenitz LW (2014) The role of charismatic rhetoric in crowdfunding: An examination with computer-Aided text analysis. *Res Methodol Strateg Manag* 9:19–48.  
<https://doi.org/10.1108/S1479-838720140000009010>
- Asongu SA, Nwachukwu JC (2018) Recent finance advances in information technology for inclusive development: a systematic review. *NETNOMICS Econ Res Electron Netw* 19:65–93.  
<https://doi.org/10.1007/s11066-018-9127-0>
- Barasinska N, Schäfer D (2014) Is Crowdfunding Different? Evidence on the Relation between Gender and Funding Success from a German Peer-to-Peer Lending Platform. *Ger Econ Rev* 15:436–452.  
<https://doi.org/10.1111/geer.12052>
- Bergamini TP, Navarro CLC, Hilliard I (2017) Is crowdfunding an appropriate financial model for social entrepreneurship? *Acad Entrep J* 23:44–57
- Berliner LS, Kenworthy NJ (2017) Producing a worthy illness: Personal crowdfunding amidst financial crisis. *Soc Sci Med* 187:233–242.  
<https://doi.org/10.1016/j.socscimed.2017.02.008>
- Bernardino S, Freitas Santos J, Cadima Ribeiro J (2016) Social crowdfunding: A new model for financing regional development? *J Urban Reg Anal* 8:97–116
- Bernardino S, Santos JF (2018) Unleashing the Intelligence of Cities by Social Innovation and Civic Crowdfunding: An Exploratory Study. *Int J Technol Hum Interact* 14:54–68.  
<https://doi.org/10.4018/IJTHI.2018040104>
- Berns JP, Figueroa-Armijos M, da Motta Veiga SP, Dunne TC (2018) Dynamics of Lending-Based Prosocial Crowdfunding: Using a Social Responsibility Lens. *J Bus Ethics* 1–17.  
<https://doi.org/10.1007/s10551-018-3932-0>
- Braund P, Schwittay A (2016) Scaling inclusive digital innovation successfully: The case of crowdfunding social enterprises. *Innov Dev* 6:15–29.  
<https://doi.org/10.1080/2157930X.2015.1067392>
- Bretschneider U, Leimeister JM (2017) Not just an ego-trip: Exploring backers' motivation for funding in incentive-based crowdfunding. *J Strateg Inf Syst* 26:246–260.  
<https://doi.org/10.1016/j.jsis.2017.02.002>

- Burtch G, Ghose A, Wattal S (2014) Cultural differences and geography as determinants of online prosocial lending. *MIS Q Manag Inf Syst* 38:773–794.  
<https://doi.org/10.25300/MISQ/2014/38.3.07>
- Calic G, Mosakowski E (2016) Kicking Off Social Entrepreneurship: How A Sustainability Orientation Influences Crowdfunding Success. *J Manag Stud* 53:738–767.  
<https://doi.org/10.1111/joms.12201>
- Carè S, Trotta A, Carè R, Rizzello A (2018) Crowdfunding for the development of smart cities. *Bus Horiz* 61:501–509.  
<https://doi.org/10.1016/j.bushor.2017.12.001>
- Chen J, Chen L, Chen J, Xie K (2018) Mechanism and policy combination of technical sustainable entrepreneurship crowdfunding in China: A system dynamics analysis. *J Clean Prod* 177:610–620.  
<https://doi.org/10.1016/j.jclepro.2017.12.217>
- Chen Y, Zhang R, Liu B (2017) Joint Decisions on Production and Pricing with Strategic Consumers for Green Crowdfunding Products. *Int J Environ Res Public Health* 14:1090.  
<https://doi.org/10.3390/ijerph14091090>
- Cox J, Nguyen T, Thorpe A, et al (2018) Being seen to care: The relationship between self-presentation and contributions to online pro-social crowdfunding campaigns. *Comput Human Behav* 83:45–55.  
<https://doi.org/10.1016/j.chb.2018.01.014>
- Cumming DJ, Leboeuf G, Schwiendbacher A (2017) Crowdfunding cleantech. *Energy Econ* 65:292–303.  
<https://doi.org/10.1016/j.eneco.2017.04.030>
- Dilger MG, Jovanović T, Voigt KI (2017) Upcrowding energy co-operatives – Evaluating the potential of crowdfunding for business model innovation of energy co-operatives. *J Environ Manage* 198:50–62.  
<https://doi.org/10.1016/j.jenvman.2017.04.025>
- Dollani A, Lerario A, Maiellaro N (2016) Sustaining cultural and natural heritage in Albania. *Sustain* 8:792.  
<https://doi.org/10.3390/su8080792>
- Elkuch A, Brunner C, Marxt C (2013) Reciprocal crowdfunding as means to enable student and graduate entrepreneurship in Africa - A case study of Rwanda. *Int J Entrep Small Bus* 19:498–516.  
<https://doi.org/10.1504/IJESB.2013.055489>
- Farnel M (2015) Kickstarting trans\*: The crowdfunding of gender/sexual reassignment surgeries. *New Media Soc* 17:215–230.  
<https://doi.org/10.1177/1461444814558911>
- Fatoki O (2014) The financing options for new small and medium enterprises in South Africa. *Mediterr J Soc Sci* 5:748–755.  
<https://doi.org/10.5901/mjss.2014.v5n20p748>
- Flanigan ST (2017) Crowdfunding and Diaspora Philanthropy: An Integration of the Literature and Major Concepts. *Voluntas* 28:492–509.  
<https://doi.org/10.1007/s11266-016-9755-7>

- Frey UJ (2019) Crowdfunding – revealing preferences for environmental goods. *Manag Environ Qual An Int J* 30:538–556.  
<https://doi.org/10.1108/MEQ-05-2018-0086>
- Gallo-Cajiao E, Archibald C, Friedman R, et al (2018) Crowdfunding biodiversity conservation. *Conserv Biol* 32:1426–1435.  
<https://doi.org/10.1111/cobi.13144>
- Gleasure R, Feller J (2016) Does Heart or Head Rule Donor Behaviors in Charitable Crowdfunding Markets? *Int J Electron Commer* 20:499–524.  
<https://doi.org/10.1080/10864415.2016.1171975>
- Gonzales AL, Kwon EY, Lynch T, Fritz N (2018) “Better everyone should know our business than we lose our house”: Costs and benefits of medical crowdfunding for support, privacy, and identity. *New Media Soc* 20:641–658.  
<https://doi.org/10.1177/1461444816667723>
- González Cacheda B (2018) Social Innovation and Crisis in the Third Sector in Spain. Results, Challenges and Limitations of ‘Civic Crowdfunding.’ *J Civ Soc* 14:275–291.  
<https://doi.org/10.1080/17448689.2018.1459239>
- Greenberg J, Mollick E (2017) Activist Choice Homophily and the Crowdfunding of Female Founders\*. *Adm Sci Q* 62:341–374.  
<https://doi.org/10.1177/0001839216678847>
- Hong Y, Hu Y, Burch G (2018) Embeddedness, prosociality, and social influence: Evidence from online crowdfunding. *MIS Q Manag Inf Syst* 42:1211–1224.  
<https://doi.org/10.25300/MISQ/2018/14105>
- Hörisch J (2015) Crowdfunding for environmental ventures: An empirical analysis of the influence of environmental orientation on the success of crowdfunding initiatives. *J Clean Prod* 107:636–645.  
<https://doi.org/10.1016/j.jclepro.2015.05.046>
- Hunter A, Di Bartolomeo J (2019) “We’re a movement”: crowdfunding, journalism, and feminism. *Fem Media Stud* 19:273–287.  
<https://doi.org/10.1080/14680777.2018.1434805>
- Jancenelle VE, Javalgi R (Raj) G (2018) The effect of moral foundations in prosocial crowdfunding. *Int Small Bus J Res Entrep* 36:932–951.  
<https://doi.org/10.1177/0266242618793200>
- Jancenelle VE, Javalgi R (Raj) G, Cavusgil E (2018) The role of economic and normative signals in international prosocial crowdfunding: An illustration using market orientation and psychological capital. *Int Bus Rev* 27:208–217.  
<https://doi.org/10.1016/j.ibusrev.2017.07.002>
- Jian L, Shin J (2015) Motivations Behind Donors’ Contributions to Crowdfunded Journalism. *Mass Commun Soc* 18:165–185.  
<https://doi.org/10.1080/15205436.2014.911328>
- Jovanovic T (2019) Crowdfunding: What Do We Know so Far. *Int J Innov Technol Manag* 16: 1950009.  
<https://doi.org/10.1142/S0219877019500093>

- Koçer S (2015) Social business in online financing: Crowdfunding narratives of independent documentary producers in Turkey. *New Media Soc* 17:231–248.  
<https://doi.org/10.1177/1461444814558913>
- Lagazio C, Querci F (2018) Exploring the multi-sided nature of crowdfunding campaign success. *J Bus Res* 90:318–324.  
<https://doi.org/10.1016/j.jbusres.2018.05.031>
- Langley P, Leyshon A (2017) Capitalizing on the crowd: The monetary and financial ecologies of crowdfunding. *Environ Plan A* 49:1019–1039.  
<https://doi.org/10.1177/0308518X16687556>
- Lehner OM (2014) The formation and interplay of social capital in crowdfunded social ventures. *Entrep Reg Dev* 26:478–499.  
<https://doi.org/10.1080/08985626.2014.922623>
- Lehner OM, Nicholls A (2014) Social finance and crowdfunding for social enterprises: a public-private case study providing legitimacy and leverage. *Ventur Cap* 16:271–286.  
<https://doi.org/10.1080/13691066.2014.925305>
- Li YZ, He TL, Song YR, et al (2018) Factors impacting donors' intention to donate to charitable crowd-funding projects in China: a UTAUT-based model. *Inf Commun Soc* 21:404–415.  
<https://doi.org/10.1080/1369118X.2017.1282530>
- Lukk M, Schneiderhan E, Soares J (2018) Worthy? Crowdfunding the Canadian Health Care and Education Sectors. *Can Rev Sociol* 55:404–424.  
<https://doi.org/10.1111/cars.12210>
- Marakkath N, Attuel-Mendes L (2015) Can microfinance crowdfunding reduce financial exclusion? Regulatory issues. *Mark Intell Plan* 33:624–636.  
<https://doi.org/10.1108/IJBM-06-2014-0080>
- Marom S (2017) Social responsibility and crowdfunding businesses: A measurement development study. *Soc Responsib J* 13:235–249.  
<https://doi.org/10.1108/SRJ-07-2016-0118>
- McLean JE (2016) The contingency of change in the Anthropocene: More-than-real renegotiation of power relations in climate change institutional transformation in Australia. *Environ Plan D Soc Sp* 34:508–527.  
<https://doi.org/10.1177/0263775815618963>
- McLean JE, Fuller S (2016) Action with(out) activism: understanding digital climate change action. *Int J Sociol Soc Policy* 36:578–595.  
<https://doi.org/10.1108/IJSSP-12-2015-0136>
- Meyskens M, Bird L (2015) Crowdfunding and value creation. *Entrep Res J* 5:155–166.  
<https://doi.org/10.1515/erj-2015-0007>
- Miller S, Coutts C (2018) A multiple case study of local & creative financing of bicycle and pedestrian infrastructure. *Case Stud Transp Policy* 6:257–264.  
<https://doi.org/10.1016/j.cstp.2018.03.008>
- Moleskis M, Alegre I, Canela MA (2019) Crowdfunding Entrepreneurial or Humanitarian Needs? The Influence of Signals and Biases on Decisions. *Nonprofit Volunt Sect Q* 48:552–571.  
<https://doi.org/10.1177/0899764018802367>

- Moon Y, Hwang J (2018) Crowdfunding as an alternative means for funding sustainable appropriate technology: Acceptance determinants of backers. *Sustain* 10:1456.  
<https://doi.org/10.3390/su10051456>
- Moss TW, Renko M, Block E, Meyskens M (2018) Funding the story of hybrid ventures: Crowdfunder lending preferences and linguistic hybridity. *J Bus Ventur* 33:643–659.  
<https://doi.org/10.1016/j.jbusvent.2017.12.004>
- Motylska-Kuzma A (2018) Crowdfunding and sustainable development. *Sustain* 10:4650.  
<https://doi.org/10.3390/su10124650>
- Özdemir V, Faris J, Srivastava S (2015) Crowdfunding 2.0: the next-generation philanthropy. *EMBO Rep* 16:267–271.  
<https://doi.org/10.15252/embr.201439548>
- Parhankangas A, Renko M (2017) Linguistic style and crowdfunding success among social and commercial entrepreneurs. *J Bus Ventur* 32:215–236.  
<https://doi.org/10.1016/j.jbusvent.2016.11.001>
- Paulus TM, Roberts KR (2018) Crowdfunding a “Real-life Superhero”: The construction of worthy bodies in medical campaign narratives. *Discourse, Context Media* 21:64–72.  
<https://doi.org/10.1016/j.dcm.2017.09.008>
- Perry S, Beale N (2015) The social web and archaeology’s restructuring: Impact, exploitation, disciplinary change. *Open Archaeol* 1:153–165.  
<https://doi.org/10.1515/opar-2015-0009>
- Pietraszkiewicz A, Soppe B, Formanowicz M (2017) Go Pro Bono Prosocial Language as a Success Factor in Crowdfunding. *Soc Psychol (Gott)* 48:265–278.  
<https://doi.org/10.1027/1864-9335/a000319>
- Radu MB, McManus L (2018) A Qualitative Analysis of Requests for Financial Help via GoFundMe by Victims of Intimate Partner Violence. *Sociol Spectr* 38:312–325.  
<https://doi.org/10.1080/02732173.2018.1502105>
- Renwick MJ, Mossialos E (2017) Crowdfunding our health: Economic risks and benefits. *Soc Sci Med* 191:48–56.  
<https://doi.org/10.1016/j.socscimed.2017.08.035>
- Rijanto A (2018) Donation-based crowdfunding as corporate social responsibility activities and financing. *J Gen Manag* 43:79–88.  
<https://doi.org/10.1177/0306307017748125>
- Roesch-McNally GE, Rabotyagov SS (2016) Paying for Forest Ecosystem Services: Voluntary Versus Mandatory Payments. *Environ Manage* 57:585–600.  
<https://doi.org/10.1007/s00267-015-0641-7>
- Ryu S, Kim YG (2018) Money is not everything: A typology of crowdfunding project creators. *J Strateg Inf Syst* 27:350–368.  
<https://doi.org/10.1016/j.jsis.2018.10.004>
- Sharma S, Singh AK, Ahmad N, Shukla B (2017) Wave of crowd funding in social business in USA & UK and its implication in India. *Int J Appl Bus Econ Res* 15:559–568

- Shengfen Z (2018) Investigation into Funding Strategies of Social Enterprises. *China Nonprofit Rev* 10:34–61.  
<https://doi.org/10.1163/18765149-12341340>
- Shulin Z, Chienliang K (2018) How social media are changing nonprofit advocacy: Evidence from the crowdfunding platform in Taiwan. *China Nonprofit Rev* 10:349–370.  
<https://doi.org/10.1163/18765149-12341352>
- Siapera E, Papadopoulou L (2018) Radical documentaries, neoliberal crisis and post-democracy. *TripleC* 16:1–17.  
<https://doi.org/10.31269/vol16iss1pp1-17>
- Simeoni F, De Crescenzo V (2018) Ecomuseums (on Clean Energy), cycle tourism and Civic Crowdfunding: A new match for sustainability? *Sustain* 10:817.  
<https://doi.org/10.3390/su10030817>
- Snyder J (2016) Crowdfunding FOR MEDICAL CARE: Ethical Issues in an Emerging Health Care Funding Practice. *Hastings Cent Rep* 46:36–42.  
<https://doi.org/10.1002/hast.645>
- Son-Turan S (2016) Reforming higher education finance in Turkey: The alumni-crowdfunded student debt fund “a-CSDF” model. *Egit ve Bilim* 41:267–289.  
<https://doi.org/10.15390/EB.2016.6137>
- Stiver A, Barroca L, Minocha S, et al (2015) Civic crowdfunding research: Challenges, opportunities, and future agenda. *New Media Soc* 17:249–271.  
<https://doi.org/10.1177/1461444814558914>
- Vasileiadou E, Huijben JCCM, Raven RPJM (2016) Three is a crowd? Exploring the potential of crowdfunding for renewable energy in the Netherlands. *J Clean Prod* 128:142–155.  
<https://doi.org/10.1016/j.jclepro.2015.06.028>
- Vealey KP, Gerding JM (2016) Rhetorical work in crowd-based entrepreneurship: Lessons learned from teaching crowdfunding as an emerging site of professional and technical communication. *IEEE Trans Prof Commun* 59:407–427.  
<https://doi.org/10.1109/TPC.2016.2614742>
- Yeoh P (2014) Implications of online funding regulations for small businesses. *J Financ Regul Compliance* 22:349–364.  
<https://doi.org/10.1108/JFRC-02-2014-0012>
- Younkin P, Kuppuswamy V (2018) The colorblind crowd? Founder race and performance in crowdfunding. *Manage Sci* 64:3269–3287.  
<https://doi.org/10.1287/mnsc.2017.2774>
- Zeng J (2018) Fostering path of ecological sustainable entrepreneurship within big data network system. *Int Entrep Manag J* 14:79–95.  
<https://doi.org/10.1007/s11365-017-0466-3>
- Zhao Y, Qin Y, Zhao X, Shi L (2018) Relationship Between Entrepreneurial Motivation and Crowdfunding Success Based on Qualitative Analysis-Based on Kickstarter Website Data. *Wirel Pers Commun* 102:1723–1734.  
<https://doi.org/10.1007/s11277-017-5230-z>

Zheng H, Xu B, Wang T, Chen D (2017) Project Implementation Success in Reward-Based Crowdfunding: An Empirical Study. *Int J Electron Commer* 21:424–448.  
<https://doi.org/10.1080/10864415.2016.1319233>

Zheng Q, Liu SD (2017) Crowdfunding as a Practice of Cultural Citizenship in China: A Case Study of Four NGOs. *J Creat Commun* 12:1–12.  
<https://doi.org/10.1177/0973258616688965>

Zhu L, Zhang Q, Lu H, et al (2017) Study on crowdfunding's promoting effect on the expansion of electric vehicle charging piles based on game theory analysis. *Appl Energy* 196:238–248.  
<https://doi.org/10.1016/j.apenergy.2016.11.060>
